# Supplementary material for: Identification of Loci Modulating the Cardiovascular and Skeletal Phenotypes of Marfan Syndrome in Mice
Source: PubMed Central journal article supplement (PMC4772474; doi:10.1038/srep22426), 2016-03-01
Supplement: srep22426-s1.pdf [file srep22426-s1.pdf]

**IDENTIFICATION OF LOCI MODULATING THE CARDIOVASCULAR AND  
SKELETAL PHENOTYPES OF MARFAN SYNDROME IN MICE**

Gustavo R. Fernandes<sup>1</sup>, Silvia M. G. Massironi<sup>2</sup>, Lygia V. Pereira<sup>1\*</sup>.

<sup>1</sup>Department of Genetics and Evolutionary Biology – Institute of Biosciences,

<sup>2</sup>Department of Immunology – Institute of Biomedical Sciences, University of São Paulo, São Paulo, Brazil.

\* corresponding author (lpereira@usp.br)

### Phenotype Distribution

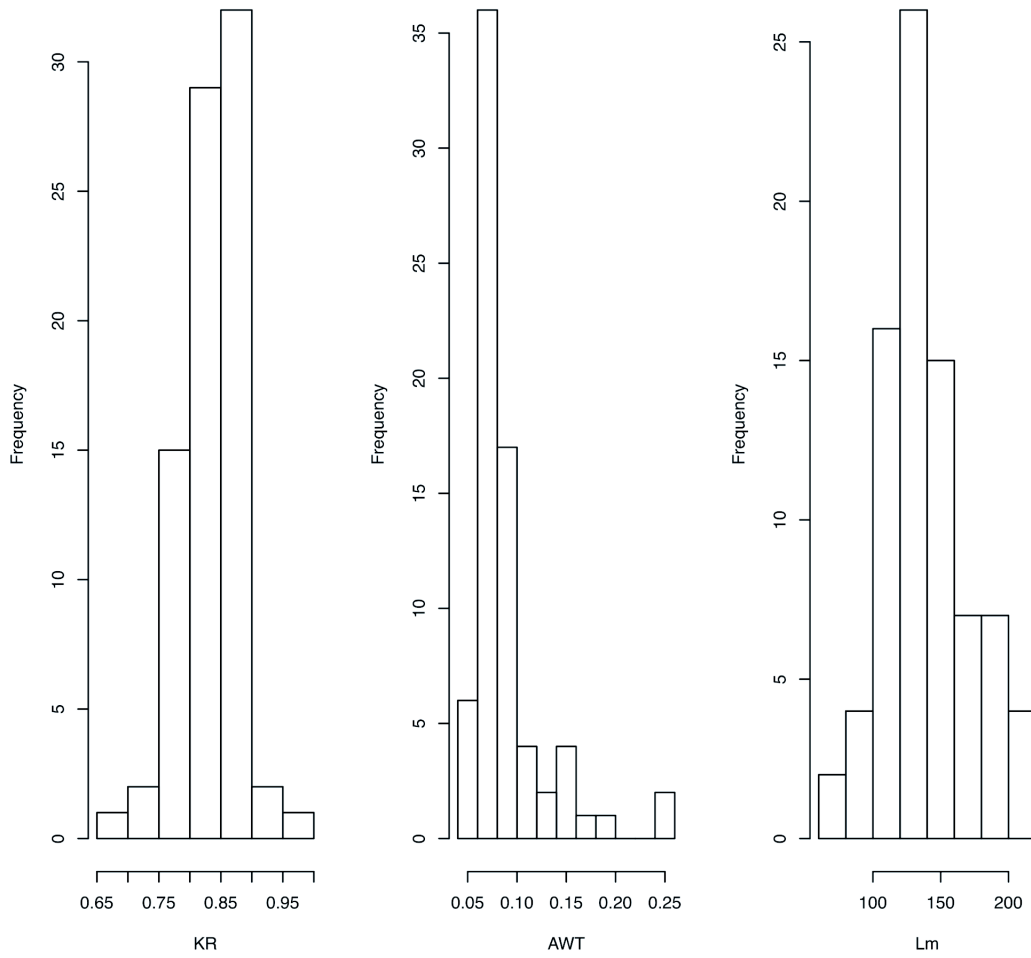

**Supplementary Figure 1:** Phenotypic distribution for the skeletal (KR), cardiovascular (AWT) and pulmonary (Lm) manifestations.

**Supplementary Table 1: Genes in the Chromosome 6 locus Krq1.**

|                      |                      |                   |                   |                   |
|----------------------|----------------------|-------------------|-------------------|-------------------|
| <i>1700010K10Rik</i> | <i>1700123L14Rik</i> | <i>5_8S_rRNA</i>  | <i>7SK</i>        | <i>7SK</i>        |
| <i>A730049H05Rik</i> | <i>AC131676.1</i>    | <i>AC131700.1</i> | <i>AC152987.1</i> | <i>AC157096.1</i> |
| <i>AC158665.1</i>    | <i>AC162038.1</i>    | <i>Adamts9</i>    | <i>Arl6ip5</i>    | <i>AY512915</i>   |
| <i>Chl1</i>          | <i>Cntn3</i>         | <i>Cntn4</i>      | <i>Cntn6</i>      | <i>Eif4e3</i>     |
| <i>Eogt</i>          | <i>Fam19a1</i>       | <i>Fam19a4</i>    | <i>Foxp1</i>      | <i>Frmd4b</i>     |
| <i>Gm10234</i>       | <i>Gm15531</i>       | <i>Gm15576</i>    | <i>Gm15631</i>    | <i>Gm15737</i>    |
| <i>Gm20696</i>       | <i>Gm20705</i>       | <i>Gm6565</i>     | <i>Gm765</i>      | <i>Gm9871</i>     |
| <i>Gpr27</i>         | <i>Gxylt2</i>        | <i>Kbtbd8</i>     | <i>Lmod3</i>      | <i>Lrig1</i>      |
| <i>Magi1</i>         | <i>Mitf</i>          | <i>Pdzrn3</i>     | <i>Ppp4r2</i>     | <i>Prickle2</i>   |
| <i>Prok2</i>         | <i>Rybp</i>          | <i>Shq1</i>       | <i>Slc25a26</i>   | <i>SNORA17</i>    |
| <i>SNORA17</i>       | <i>SNORA17</i>       | <i>SNORA17</i>    | <i>SNORA36</i>    | <i>SNORA44</i>    |
| <i>SNORA48</i>       | <i>SNORA63</i>       | <i>Suc1g2</i>     | <i>Tmfl</i>       | <i>Tpt1-ps3</i>   |
| <i>Trh</i>           | <i>U1</i>            | <i>U6</i>         | <i>U6</i>         | <i>U6</i>         |
| <i>U6</i>            | <i>U7</i>            | <i>U7</i>         | <i>Uba3</i>       | <i>Zfyve20</i>    |

**Supplementary Table 2: Genes in the Chromosome 3 locus Krq2.**

|                      |                      |                      |                      |                   |
|----------------------|----------------------|----------------------|----------------------|-------------------|
| <i>1110002E22Rik</i> | <i>4930422G04Rik</i> | <i>4930579F01Rik</i> | <i>5730508B09Rik</i> | <i>5S_rRNA</i>    |
| <i>AC098732.1</i>    | <i>AC099576.1</i>    | <i>AC102128.1</i>    | <i>AC111097.1</i>    | <i>AC114668.1</i> |
| <i>AC125040.1</i>    | <i>AC135118.1</i>    | <i>AC140486.1</i>    | <i>AC140486.2</i>    | <i>AC164408.1</i> |
| <i>AC165333.1</i>    | <i>Adh1</i>          | <i>Adh4</i>          | <i>Adh5</i>          | <i>Adh6-ps1</i>   |
| <i>Adh6a</i>         | <i>Adh6b</i>         | <i>Adh7</i>          | <i>Agxt2l1</i>       | <i>Aimp1</i>      |
| <i>Alpk1</i>         | <i>Ank2</i>          | <i>Ap1ar</i>         | <i>B930007M17Rik</i> | <i>Bank1</i>      |
| <i>Bdh2</i>          | <i>Bmpr1b</i>        | <i>Casp6</i>         | <i>Ccbl2</i>         | <i>Ccdc109b</i>   |
| <i>Cenpe</i>         | <i>Cfi</i>           | <i>Cisd2</i>         | <i>Col25a1</i>       | <i>Cxxc4</i>      |
| <i>Cyp2u1</i>        | <i>D630013G24Rik</i> | <i>Dapp1</i>         | <i>Ddit4l</i>        | <i>Dkk2</i>       |
| <i>Dnajb14</i>       | <i>Egf</i>           | <i>Eif4e</i>         | <i>Elovl6</i>        | <i>Emcn</i>       |
| <i>Enpep</i>         | <i>Gar1</i>          | <i>Gbp1</i>          | <i>Gbp2</i>          | <i>Gbp3</i>       |
| <i>Gbp5</i>          | <i>Gbp7</i>          | <i>Gm10650</i>       | <i>Gm15460</i>       | <i>Gm15540</i>    |
| <i>Gm15688</i>       | <i>Gm15689</i>       | <i>Gm16060</i>       | <i>Gm16100</i>       | <i>Gm16238</i>    |
| <i>Gm16559</i>       | <i>Gm2574</i>        | <i>Gm4392</i>        | <i>Gm4861</i>        | <i>Gm4862</i>     |
| <i>Gm5105</i>        | <i>Gm5549</i>        | <i>Gm9387</i>        | <i>Gm9396</i>        | <i>Gm9799</i>     |
| <i>Gstcd</i>         | <i>Gtf2b</i>         | <i>H2afz</i>         | <i>Hadh</i>          | <i>Ints12</i>     |
| <i>Lamtor3</i>       | <i>Larp7</i>         | <i>Lef1</i>          | <i>Manba</i>         | <i>Metap1</i>     |
| <i>Mir1895</i>       | <i>Mir1956</i>       | <i>Mir302a</i>       | <i>Mir302b</i>       | <i>Mir302c</i>    |
| <i>Mir302d</i>       | <i>Mir367</i>        | <i>Mttp</i>          | <i>Neurog2</i>       | <i>Nfkb1</i>      |
| <i>Nhedc1</i>        | <i>Nhedc2</i>        | <i>Npnt</i>          | <i>Oaz2-ps</i>       | <i>Ostc</i>       |
| <i>Papss1</i>        | <i>Pdha2</i>         | <i>Pdlim5</i>        | <i>Pitx2</i>         | <i>Pkn2</i>       |
| <i>Pla2g12a</i>      | <i>Ppa2</i>          | <i>Ppp3ca</i>        | <i>Rap1gds1</i>      | <i>Rg9mtd2</i>    |
| <i>Rpl34</i>         | <i>Rrh</i>           | <i>Sec24b</i>        | <i>Sgms2</i>         | <i>Slc39a8</i>    |
| <i>SNORA17</i>       | <i>SNORA17</i>       | <i>SNORA17</i>       | <i>SNORA17</i>       | <i>SNORA32</i>    |
| <i>SNORA61</i>       | <i>Tacr3</i>         | <i>Tbck</i>          | <i>Tet2</i>          | <i>Tifa</i>       |
| <i>Tspan5</i>        | <i>U1</i>            | <i>U6</i>            | <i>U6</i>            | <i>U6</i>         |
| <i>U6</i>            | <i>U6</i>            | <i>U6</i>            | <i>U6</i>            | <i>U6</i>         |
| <i>U6</i>            | <i>U6</i>            | <i>Ube2d3</i>        | <i>Unc5c</i>         |                   |

**Supplementary Table 3: Genes in the X Chromosome locus Krq3.**

|                      |                      |                      |                      |                      |
|----------------------|----------------------|----------------------|----------------------|----------------------|
| <i>1700012L04Rik</i> | <i>1700054O13Rik</i> | <i>1810030O07Rik</i> | <i>2010204K13Rik</i> | <i>2900002K06Rik</i> |
| <i>2900008C10Rik</i> | <i>4930402K13Rik</i> | <i>4930453H23Rik</i> | <i>4930524L23Rik</i> | <i>4930557A04Rik</i> |
| <i>4930578C19Rik</i> | <i>4933416E14Rik</i> | <i>5730405O15Rik</i> | <i>5S_rRNA</i>       | <i>5S_rRNA</i>       |
| <i>A230072C01Rik</i> | <i>AA414768</i>      | <i>Agtr2</i>         | <i>Akap4</i>         | <i>AL662925.1</i>    |
| <i>AL671117.1</i>    | <i>AL671211.1</i>    | <i>AL671492.1</i>    | <i>AL671885.1</i>    | <i>AL671885.2</i>    |
| <i>AL671922.1</i>    | <i>AL732400.1</i>    | <i>AL773580.1</i>    | <i>Araf</i>          | <i>Atp6ap2</i>       |
| <i>AU022751</i>      | <i>B630019K06Rik</i> | <i>BC049702</i>      | <i>Bcor</i>          | <i>Bmp15</i>         |
| <i>BX571729.1</i>    | <i>Cacnal1f</i>      | <i>Cask</i>          | <i>Ccdc120</i>       | <i>Ccdc22</i>        |
| <i>Ccnb3</i>         | <i>Cdk16</i>         | <i>Cfp</i>           | <i>Chst7</i>         | <i>Cln5</i>          |
| <i>Csnk2a1-ps</i>    | <i>CT867956.1</i>    | <i>CT867960.1</i>    | <i>CT868697.1</i>    | <i>CT954250.1</i>    |
| <i>CT963124.1</i>    | <i>CT963124.2</i>    | <i>CT963124.3</i>    | <i>CU468592.1</i>    | <i>Cybb</i>          |
| <i>Cypt1</i>         | <i>Ddx3x</i>         | <i>Dgkk</i>          | <i>Drr1</i>          | <i>Dusp21</i>        |
| <i>Dynlt3</i>        | <i>E330010L02Rik</i> | <i>Ebp</i>           | <i>Efhc2</i>         | <i>Elk1</i>          |
| <i>Eras</i>          | <i>Foxp3</i>         | <i>FQ976806.1</i>    | <i>Fthl17</i>        | <i>Ftsj1</i>         |
| <i>Fundc1</i>        | <i>Gata1</i>         | <i>Glod5</i>         | <i>Gm10058</i>       | <i>Gm10096</i>       |
| <i>Gm10147</i>       | <i>Gm10230</i>       | <i>Gm10487</i>       | <i>Gm10488</i>       | <i>Gm10490</i>       |
| <i>Gm10491</i>       | <i>Gm14363</i>       | <i>Gm14365</i>       | <i>Gm14366</i>       | <i>Gm14367</i>       |
| <i>Gm14369</i>       | <i>Gm14370</i>       | <i>Gm14373</i>       | <i>Gm14374</i>       | <i>Gm14375</i>       |
| <i>Gm14379</i>       | <i>Gm14380</i>       | <i>Gm14381</i>       | <i>Gm14394</i>       | <i>Gm14395</i>       |
| <i>Gm14448</i>       | <i>Gm14450</i>       | <i>Gm14451</i>       | <i>Gm14452</i>       | <i>Gm14457</i>       |
| <i>Gm14458</i>       | <i>Gm14459</i>       | <i>Gm14470</i>       | <i>Gm14473</i>       | <i>Gm14474</i>       |
| <i>Gm14475</i>       | <i>Gm14476</i>       | <i>Gm14477</i>       | <i>Gm14478</i>       | <i>Gm14479</i>       |
| <i>Gm14480</i>       | <i>Gm14481</i>       | <i>Gm14482</i>       | <i>Gm14483</i>       | <i>Gm14484</i>       |
| <i>Gm14485</i>       | <i>Gm14491</i>       | <i>Gm14493</i>       | <i>Gm14499</i>       | <i>Gm14500</i>       |
| <i>Gm14501</i>       | <i>Gm14502</i>       | <i>Gm14503</i>       | <i>Gm14504</i>       | <i>Gm14505</i>       |
| <i>Gm14506</i>       | <i>Gm14509</i>       | <i>Gm14510</i>       | <i>Gm14511</i>       | <i>Gm14512</i>       |
| <i>Gm14513</i>       | <i>Gm14514</i>       | <i>Gm14515</i>       | <i>Gm14516</i>       | <i>Gm14517</i>       |
| <i>Gm14518</i>       | <i>Gm14519</i>       | <i>Gm14520</i>       | <i>Gm14521</i>       | <i>Gm14523</i>       |
| <i>Gm14524</i>       | <i>Gm14525</i>       | <i>Gm14527</i>       | <i>Gm14529</i>       | <i>Gm14530</i>       |
| <i>Gm14531</i>       | <i>Gm14533</i>       | <i>Gm14534</i>       | <i>Gm14535</i>       | <i>Gm14536</i>       |
| <i>Gm14537</i>       | <i>Gm14538</i>       | <i>Gm14539</i>       | <i>Gm14558</i>       | <i>Gm14561</i>       |
| <i>Gm14562</i>       | <i>Gm14563</i>       | <i>Gm14632</i>       | <i>Gm14634</i>       | <i>Gm14635</i>       |
| <i>Gm14636</i>       | <i>Gm14703</i>       | <i>Gm14720</i>       | <i>Gm14799</i>       | <i>Gm14820</i>       |
| <i>Gm14862</i>       | <i>Gm14863</i>       | <i>Gm14864</i>       | <i>Gm14865</i>       | <i>Gm14867</i>       |
| <i>Gm14883</i>       | <i>Gm14884</i>       | <i>Gm14885</i>       | <i>Gm14974</i>       | <i>Gm15027</i>       |
| <i>Gm15028</i>       | <i>Gm15029</i>       | <i>Gm15030</i>       | <i>Gm15276</i>       | <i>Gm15280</i>       |
| <i>Gm15432</i>       | <i>Gm16265</i>       | <i>Gm16479</i>       | <i>Gm16480</i>       | <i>Gm16481</i>       |
| <i>Gm1848</i>        | <i>Gm1989</i>        | <i>Gm2003</i>        | <i>Gm2005</i>        | <i>Gm2012</i>        |
| <i>Gm2030</i>        | <i>Gm2066</i>        | <i>Gm2092</i>        | <i>Gm2101</i>        | <i>Gm2117</i>        |
| <i>Gm2165</i>        | <i>Gm2200</i>        | <i>Gm2759</i>        | <i>Gm2768</i>        | <i>Gm2777</i>        |

|                      |                  |                   |                   |                   |
|----------------------|------------------|-------------------|-------------------|-------------------|
| <i>Gm2784</i>        | <i>Gm2790</i>    | <i>Gm2799</i>     | <i>Gm2825</i>     | <i>Gm3657</i>     |
| <i>Gm3669</i>        | <i>Gm3677</i>    | <i>Gm3681</i>     | <i>Gm4297</i>     | <i>Gm4732</i>     |
| <i>Gm4789</i>        | <i>Gm4836</i>    | <i>Gm4906</i>     | <i>Gm4907</i>     | <i>Gm4984</i>     |
| <i>Gm4985</i>        | <i>Gm5073</i>    | <i>Gm5123</i>     | <i>Gm5124</i>     | <i>Gm5132</i>     |
| <i>Gm5168</i>        | <i>Gm5169</i>    | <i>Gm5379</i>     | <i>Gm5380</i>     | <i>Gm5381</i>     |
| <i>Gm5382</i>        | <i>Gm5383</i>    | <i>Gm5384</i>     | <i>Gm5634</i>     | <i>Gm5635</i>     |
| <i>Gm5751</i>        | <i>Gm5752</i>    | <i>Gm5753</i>     | <i>Gm5754</i>     | <i>Gm5755</i>     |
| <i>Gm5924</i>        | <i>Gm5926</i>    | <i>Gm5926</i>     | <i>Gm5931</i>     | <i>Gm5934</i>     |
| <i>Gm5935</i>        | <i>Gm6071</i>    | <i>Gm6079</i>     | <i>Gm6113</i>     | <i>Gm6121</i>     |
| <i>Gm6592</i>        | <i>Gm6787</i>    | <i>Gm6797</i>     | <i>Gm6798</i>     | <i>Gm6826</i>     |
| <i>Gm6829</i>        | <i>Gm6923</i>    | <i>Gm6938</i>     | <i>Gm6956</i>     | <i>Gm7079</i>     |
| <i>Gm7129</i>        | <i>Gm7164</i>    | <i>Gm7350</i>     | <i>Gm7365</i>     | <i>Gm7375</i>     |
| <i>Gm7386</i>        | <i>Gm7391</i>    | <i>Gm7398</i>     | <i>Gm7408</i>     | <i>Gm7415</i>     |
| <i>Gm7421</i>        | <i>Gm7437</i>    | <i>Gm7438</i>     | <i>Gm9083</i>     | <i>Gm9085</i>     |
| <i>Gm9428</i>        | <i>Gm9429</i>    | <i>Gm9430</i>     | <i>Gm9431</i>     | <i>Gm9432</i>     |
| <i>Gm9434</i>        | <i>Gm9435</i>    | <i>Gm9436</i>     | <i>Gm9439</i>     | <i>Gm9440</i>     |
| <i>Gmcl11</i>        | <i>Gpkow</i>     | <i>Gpr34</i>      | <i>Gpr82</i>      | <i>Gripap1</i>    |
| <i>Hdac6</i>         | <i>Kcnd1</i>     | <i>Kdm6a</i>      | <i>Klhl13</i>     | <i>Lancl3</i>     |
| <i>Magix</i>         | <i>Maoa</i>      | <i>Maob</i>       | <i>Med14</i>      | <i>Midlip1</i>    |
| <i>Mir1198</i>       | <i>Mir188</i>    | <i>Mir221</i>     | <i>Mir222</i>     | <i>Mir362</i>     |
| <i>Mir500</i>        | <i>Mir501</i>    | <i>Mir532</i>     | <i>Myes</i>       | <i>n-R5s2</i>     |
| <i>n-R5s3</i>        | <i>n-R5s5</i>    | <i>Ndp</i>        | <i>Ndufb11</i>    | <i>Nudt10</i>     |
| <i>Nudt11</i>        | <i>Nyx</i>       | <i>Otc</i>        | <i>Otud5</i>      | <i>Pcsk1n</i>     |
| <i>Phf16</i>         | <i>Pim2</i>      | <i>Plp2</i>       | <i>Porcn</i>      | <i>Ppp1r2-ps7</i> |
| <i>Ppp1r2-ps9</i>    | <i>Ppp1r3f</i>   | <i>Pqbp1</i>      | <i>Praf2</i>      | <i>Prickle3</i>   |
| <i>Psmb6-ps</i>      | <i>Psmb7-ps2</i> | <i>Rbm10</i>      | <i>Rbm3</i>       | <i>Rgn</i>        |
| <i>RP23-367O24.1</i> | <i>Rp2h</i>      | <i>Rpgr</i>       | <i>Rpl19-ps12</i> | <i>Rpl22-ps1</i>  |
| <i>Rpl23a-ps13</i>   | <i>Rpl3-ps1</i>  | <i>Rpl30-ps11</i> | <i>Rpl36-ps10</i> | <i>Shroom4</i>    |
| <i>Slc35a2</i>       | <i>Slc38a5</i>   | <i>Slc6a14</i>    | <i>Slc9a7</i>     | <i>Slx</i>        |
| <i>Smt3h2-ps</i>     | <i>SNORA17</i>   | <i>SNORA40</i>    | <i>SNORA70</i>    | <i>Spaca5</i>     |
| <i>Srpx</i>          | <i>Ssx9</i>      | <i>Ssxa1</i>      | <i>Ssxb1</i>      | <i>Ssxb10</i>     |
| <i>Ssxb2</i>         | <i>Ssxb3</i>     | <i>Ssxb5</i>      | <i>Ssxb6</i>      | <i>Ssxb8</i>      |
| <i>Ssxb9</i>         | <i>Suv39h1</i>   | <i>Syn1</i>       | <i>Syp</i>        | <i>Syt15</i>      |
| <i>Tbc1d25</i>       | <i>Tfe3</i>      | <i>Timm17b</i>    | <i>Timp1</i>      | <i>Tspan7</i>     |
| <i>U1</i>            | <i>U1</i>        | <i>U2</i>         | <i>U2</i>         | <i>U6</i>         |
| <i>U6</i>            | <i>U6</i>        | <i>U6</i>         | <i>U6</i>         | <i>U6</i>         |
| <i>U6</i>            | <i>U6</i>        | <i>U6</i>         | <i>U6</i>         | <i>U6</i>         |
| <i>U6</i>            | <i>Uba1</i>      | <i>Usp11</i>      | <i>Usp27x</i>     | <i>Usp9x</i>      |
| <i>Uxt</i>           | <i>Was</i>       | <i>Wdr13</i>      | <i>Wdr44</i>      | <i>Wdr45</i>      |
| <i>Xk</i>            | <i>Zfp182</i>    | <i>Zfp300</i>     |                   |                   |

**Supplementary Table 4: Genes in the Chromosome 4 locus Awt1.**

|                      |                      |                      |                      |                      |
|----------------------|----------------------|----------------------|----------------------|----------------------|
| <i>1110049F12Rik</i> | <i>1700013G24Rik</i> | <i>1700021N21Rik</i> | <i>1700029M20Rik</i> | <i>1700037C06Rik</i> |
| <i>1700095J12Rik</i> | <i>1810058N05Rik</i> | <i>2310026L22Rik</i> | <i>2610002D18Rik</i> | <i>2610528B01Rik</i> |
| <i>4930549C01Rik</i> | <i>4930555I21Rik</i> | <i>6030445D17Rik</i> | <i>9130020K20Rik</i> | <i>A330049M08Rik</i> |
| <i>AB041806</i>      | <i>AL645531.1</i>    | <i>AL669982.1</i>    | <i>AL670720.1</i>    | <i>AL671011.1</i>    |
| <i>AL671011.2</i>    | <i>AL671173.1</i>    | <i>AL672076.1</i>    | <i>AL807764.1</i>    | <i>Alpl</i>          |
| <i>Asap3</i>         | <i>BX000694.1</i>    | <i>C1qa</i>          | <i>C1qb</i>          | <i>C1qc</i>          |
| <i>Camk2n1</i>       | <i>Catsper4</i>      | <i>Ccdc21</i>        | <i>Cda</i>           | <i>Cdc42</i>         |
| <i>Cela3b</i>        | <i>Clic4</i>         | <i>Cnksr1</i>        | <i>Cnr2</i>          | <i>D4Wsu53e</i>      |
| <i>Ddost</i>         | <i>E130218I03Rik</i> | <i>E2f2</i>          | <i>Ecel</i>          | <i>Eif4g3</i>        |
| <i>Epha8</i>         | <i>Ephb2</i>         | <i>Extl1</i>         | <i>Fam43b</i>        | <i>Fam54b</i>        |
| <i>Fuca1</i>         | <i>Gale</i>          | <i>Gm12982</i>       | <i>Gm12983</i>       | <i>Gm12984</i>       |
| <i>Gm12986</i>       | <i>Gm12987</i>       | <i>Gm12988</i>       | <i>Gm12989</i>       | <i>Gm12990</i>       |
| <i>Gm12991</i>       | <i>Gm13000</i>       | <i>Gm13001</i>       | <i>Gm13002</i>       | <i>Gm13003</i>       |
| <i>Gm13005</i>       | <i>Gm13006</i>       | <i>Gm13007</i>       | <i>Gm13008</i>       | <i>Gm13009</i>       |
| <i>Gm13010</i>       | <i>Gm13011</i>       | <i>Gm13012</i>       | <i>Gm13013</i>       | <i>Gm13030</i>       |
| <i>Gm13131</i>       | <i>Gm13195</i>       | <i>Gm13250</i>       | <i>Gm15979</i>       | <i>Gm16224</i>       |
| <i>Gm16225</i>       | <i>Gm7534</i>        | <i>Grhl3</i>         | <i>Grrp1</i>         | <i>Hmgcl</i>         |
| <i>Hnrnpr</i>        | <i>Hp1bp3</i>        | <i>Hspg2</i>         | <i>Htr1d</i>         | <i>Id3</i>           |
| <i>Il22ra1</i>       | <i>Il28ra</i>        | <i>Kdm1a</i>         | <i>Kif17</i>         | <i>Lactbl1</i>       |
| <i>Ldlrad2</i>       | <i>Ldlrap1</i>       | <i>Luzp1</i>         | <i>Lypla2</i>        | <i>Man1c1</i>        |
| <i>Mir700</i>        | <i>Mul1</i>          | <i>Myom3</i>         | <i>Nipal3</i>        | <i>Otud3</i>         |
| <i>Pafah2</i>        | <i>Paqr7</i>         | <i>Pdik1l</i>        | <i>Pink1</i>         | <i>Pla2g2a</i>       |
| <i>Pla2g2c</i>       | <i>Pla2g2d</i>       | <i>Pla2g2e</i>       | <i>Pla2g2f</i>       | <i>Pla2g5</i>        |
| <i>Pnrc2</i>         | <i>Rap1gap</i>       | <i>Rcan3</i>         | <i>Rhd</i>           | <i>Rpl11</i>         |
| <i>Rpl31-ps10</i>    | <i>Rpl38-ps1</i>     | <i>Runx3</i>         | <i>Sepn1</i>         | <i>Sh2d5</i>         |
| <i>Sh3bgrl3</i>      | <i>Slc30a2</i>       | <i>SNORA17</i>       | <i>Srrm1</i>         | <i>Srsf10</i>        |
| <i>Stmn1</i>         | <i>Syf2</i>          | <i>Tcea3</i>         | <i>Tceb3</i>         | <i>Tmem50a</i>       |
| <i>Tmem57</i>        | <i>Trim63</i>        | <i>U1</i>            | <i>U6</i>            | <i>U6</i>            |
| <i>U6</i>            | <i>U6</i>            | <i>Ubxn10</i>        | <i>Ubxn11</i>        | <i>Usp48</i>         |
| <i>Vwa5b1</i>        | <i>Wnt4</i>          | <i>Zbtb40</i>        | <i>Zfp46</i>         | <i>Zfp593</i>        |

**Supplementary Table 5: Genes in the Chromosome 13 locus Awtq2.**

|                      |                      |                      |                      |                      |
|----------------------|----------------------|----------------------|----------------------|----------------------|
| <i>1700024P04Rik</i> | <i>1700029F12Rik</i> | <i>1700119I11Rik</i> | <i>4833422C13Rik</i> | <i>5330416C01Rik</i> |
| <i>7SK</i>           | <i>7SK</i>           | <i>AC123043.1</i>    | <i>AC124515.1</i>    | <i>AC130536.1</i>    |
| <i>AC131739.1</i>    | <i>AC136976.1</i>    | <i>AC137692.1</i>    | <i>AC154225.1</i>    | <i>AC154271.1</i>    |
| <i>AC154424.1</i>    | <i>AC154460.1</i>    | <i>AC154460.2</i>    | <i>AC160109.1</i>    | <i>AC161588.1</i>    |
| <i>Acot12</i>        | <i>Aggf1</i>         | <i>Ankdd1b</i>       | <i>Ankra2</i>        | <i>Ankrd34b</i>      |
| <i>Ap3b1</i>         | <i>Arsb</i>          | <i>Atg10</i>         | <i>Atp6ap1l</i>      | <i>AW495222</i>      |
| <i>Bhmt</i>          | <i>Bhmt2</i>         | <i>Btf3</i>          | <i>C030017D09Rik</i> | <i>Ccnh</i>          |
| <i>Ckmt2</i>         | <i>Cmya5</i>         | <i>Col4a3bp</i>      | <i>Cox7c</i>         | <i>Crhbp</i>         |
| <i>Dhfr</i>          | <i>Dmgdh</i>         | <i>Edil3</i>         | <i>Enc1</i>          | <i>F2r</i>           |
| <i>F2rl1</i>         | <i>F2rl2</i>         | <i>Fam151b</i>       | <i>Fam169a</i>       | <i>Fcho2</i>         |
| <i>Foxd1</i>         | <i>Gcnt4</i>         | <i>Gfm2</i>          | <i>Gm10320</i>       | <i>Gm11019</i>       |
| <i>Gm15620</i>       | <i>Gm15622</i>       | <i>Gm15907</i>       | <i>Gm16243</i>       | <i>Gm16318</i>       |
| <i>Gm17190</i>       | <i>Gm17352</i>       | <i>Gm17450</i>       | <i>Gm17622</i>       | <i>Gm4117</i>        |
| <i>Gm5453</i>        | <i>Gm6169</i>        | <i>Gm8526</i>        | <i>Gm9776</i>        | <i>Gm9828</i>        |
| <i>Hapln1</i>        | <i>Hexb</i>          | <i>Hmgcr</i>         | <i>Homer1</i>        | <i>Iqgap2</i>        |
| <i>Jmy</i>           | <i>Lhfpl2</i>        | <i>Mrps27</i>        | <i>Msh3</i>          | <i>Mtx3</i>          |
| <i>Nsa2</i>          | <i>Otp</i>           | <i>Papd4</i>         | <i>Pde8b</i>         | <i>Poc5</i>          |
| <i>Polk</i>          | <i>Ptcd2</i>         | <i>Rasa1</i>         | <i>Rasgrf2</i>       | <i>Rgnef</i>         |
| <i>RP24-76E2.4</i>   | <i>Rps23</i>         | <i>S100z</i>         | <i>Scamp1</i>        | <i>Serinc5</i>       |
| <i>SNORA17</i>       | <i>Snora47</i>       | <i>SNORA68</i>       | <i>snoU109</i>       | <i>snoZ39</i>        |
| <i>Spz1</i>          | <i>Ssbp2</i>         | <i>Sv2c</i>          | <i>Tbca</i>          | <i>Thbs4</i>         |
| <i>Tmem167</i>       | <i>Tmem171</i>       | <i>Tmem174</i>       | <i>Tnpo1</i>         | <i>U1</i>            |
| <i>U6</i>            | <i>U6</i>            | <i>U6</i>            | <i>Utp15</i>         | <i>Vcan</i>          |
| <i>Wdr41</i>         | <i>Xrcc4</i>         | <i>Zbed3</i>         | <i>Zcchc9</i>        | <i>Zfp366</i>        |
| <i>Zfyve16</i>       |                      |                      |                      |                      |
